# Supplementary material for: Polydopamine-mediated covalent functionalization of collagen on a titanium alloy to promote biocompatibility with soft tissues
Source: Royal Society of Chemistry journal article supplement (doi:10.1039/c8tb03379j), 2019-01-01
Supplement: c8tb03379j1.pdf [file c8tb03379j1.pdf]

## Supplementary Information

### **Polydopamine-mediated Covalent Functionalization of Collagen on Titanium Alloy to Promote Biocompatibility with Soft Tissues**

Yi Zhu <sup>† a</sup>, Dandan Liu <sup>† b, c</sup>, Xiuli Wang <sup>a</sup>, Yao He <sup>a</sup>, Wenjie Luan\* <sup>b</sup>, Fazhi Qi\* <sup>b</sup>,  
Jiandong Ding\* <sup>a</sup>

<sup>a</sup> State Key Laboratory of Molecular Engineering of Polymers, Department of Macromolecular Science, Fudan University, Shanghai 200438, China.

<sup>b</sup> Department of Plastic Surgery, Zhongshan Hospital, Fudan University, Shanghai 200032, China.

<sup>c</sup> Department of Plastic Surgery, Shenzhen Hospital, Peking University, Shenzhen 510836, China.

<sup>†</sup> These two authors contribute to the work equally.

\* Corresponding authors. E-mails: 081101010@fudan.edu.cn (WJ Luan); qi.fazhi@zs-hospital.sh.cn (FZ Qi); jdding1@fudan.edu.cn; (JD Ding)

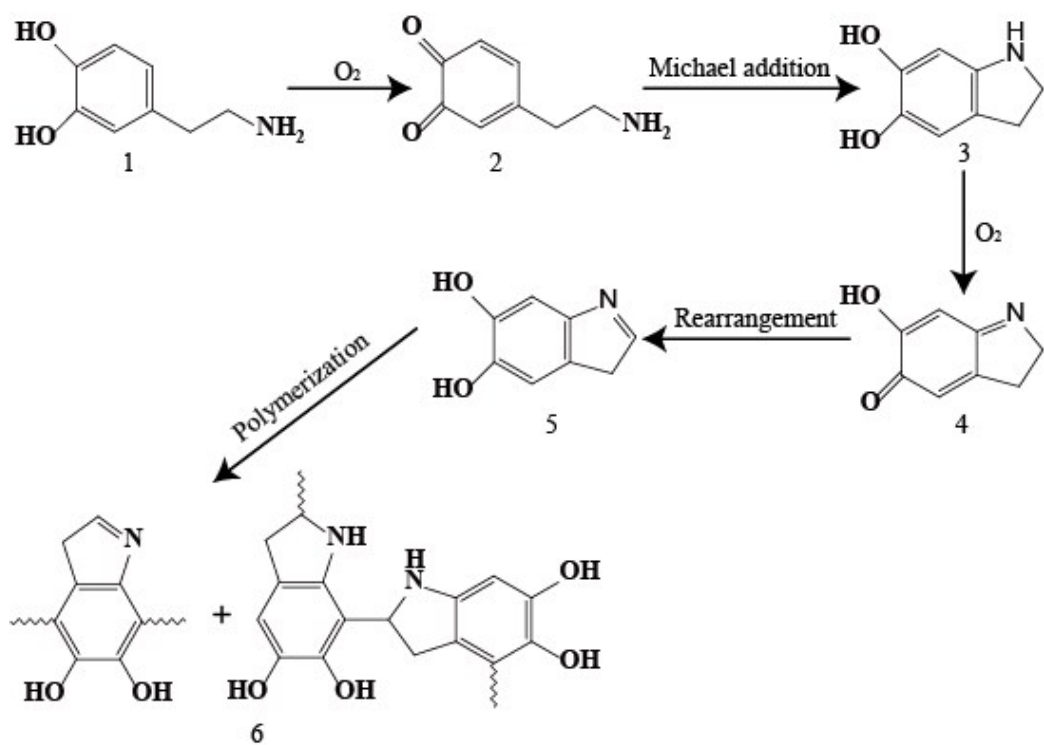

- 1: Dopamine                      2: Dopaminequinone                      3: Leukodopaminechrome  
 4: Dopaminechrome                      5: 5,6-dihydroxyindole                      6: Polydopamine

**Fig. S1** The mechanism of dopamine polymerization.

**Table S1** Percentage of atomic composition for indicated sample surfaces based on XPS survey spectra.

|                  | C/%  | N/%  | O/%  | Ti/% |
|------------------|------|------|------|------|
| Ti (control)     | 49.6 | 1.9  | 36.4 | 8.7  |
| Ti-PDA           | 50.5 | 6.5  | 20.5 | 1.5  |
| Ti-PDA-Col       | 64.6 | 12.6 | 21.7 | 1.1  |
| Ti-PDA-Col 7-day | 65.8 | 11.8 | 21.2 | 1.2  |
| Ti-Col           | 65.3 | 9.1  | 21.8 | 1.2  |
| Ti-Col 7-day     | 55.4 | 4.2  | 33.2 | 7.2  |

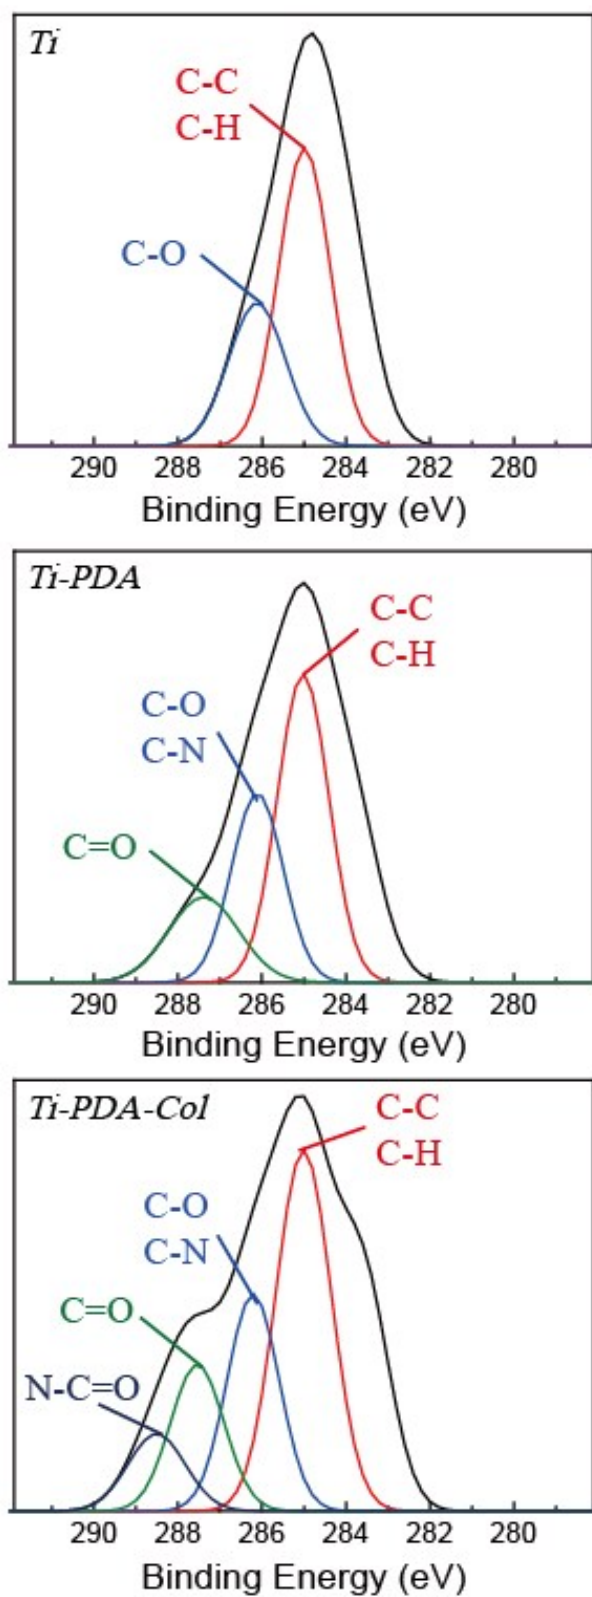

**Fig. S2** Characterization of surface chemical structure: XPS high resolution spectra of C<sub>1s</sub> for indicated sample surfaces.

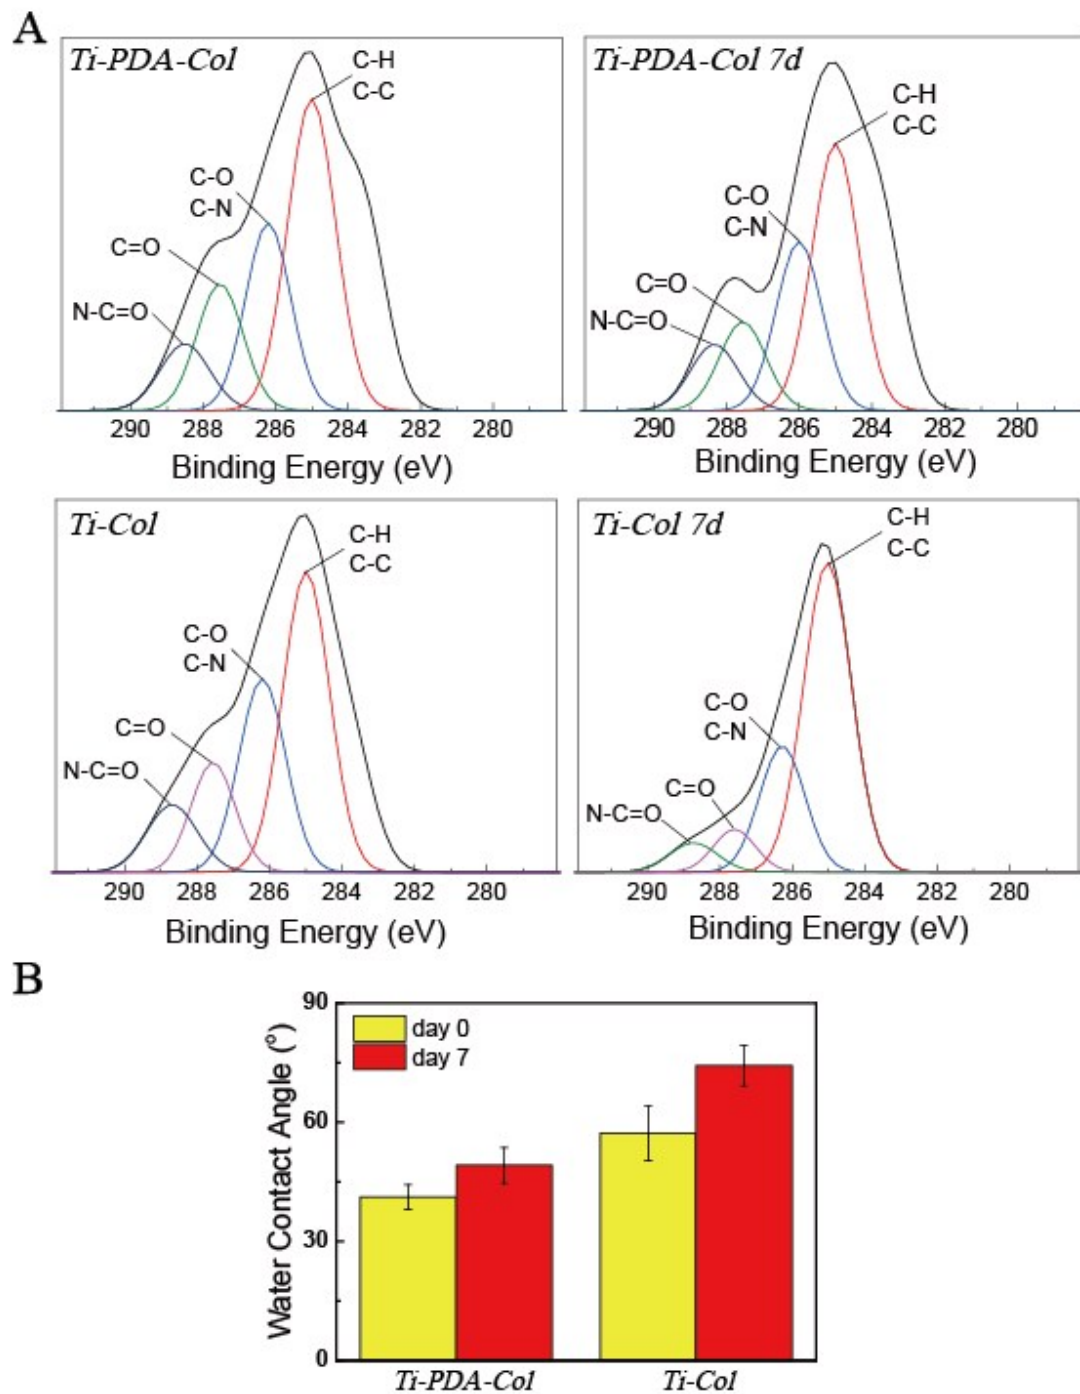

**Fig. S3** (A) The XPS high resolution spectra of  $C_{1s}$  and (B) static water contact angle for *Ti-PDA-Col* and *Ti-Col* surfaces before and after being immersed in PBS buffer for seven days.

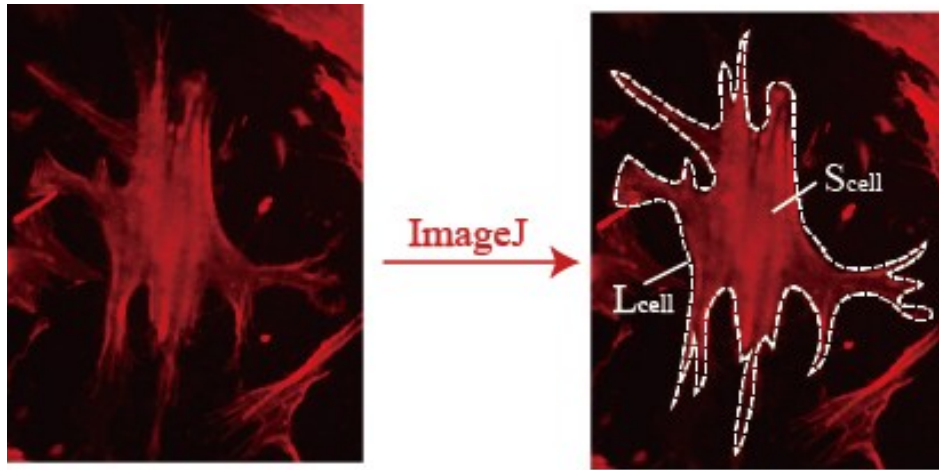

$$SI = \frac{4\pi S}{L^2}$$

**Fig. S4** A schematic illustration of the way to semi-quantify the perimeter ( $L$ ) and spreading area ( $S$ ) of stained cells with ImageJ and the calculation formula of shape index (SI).

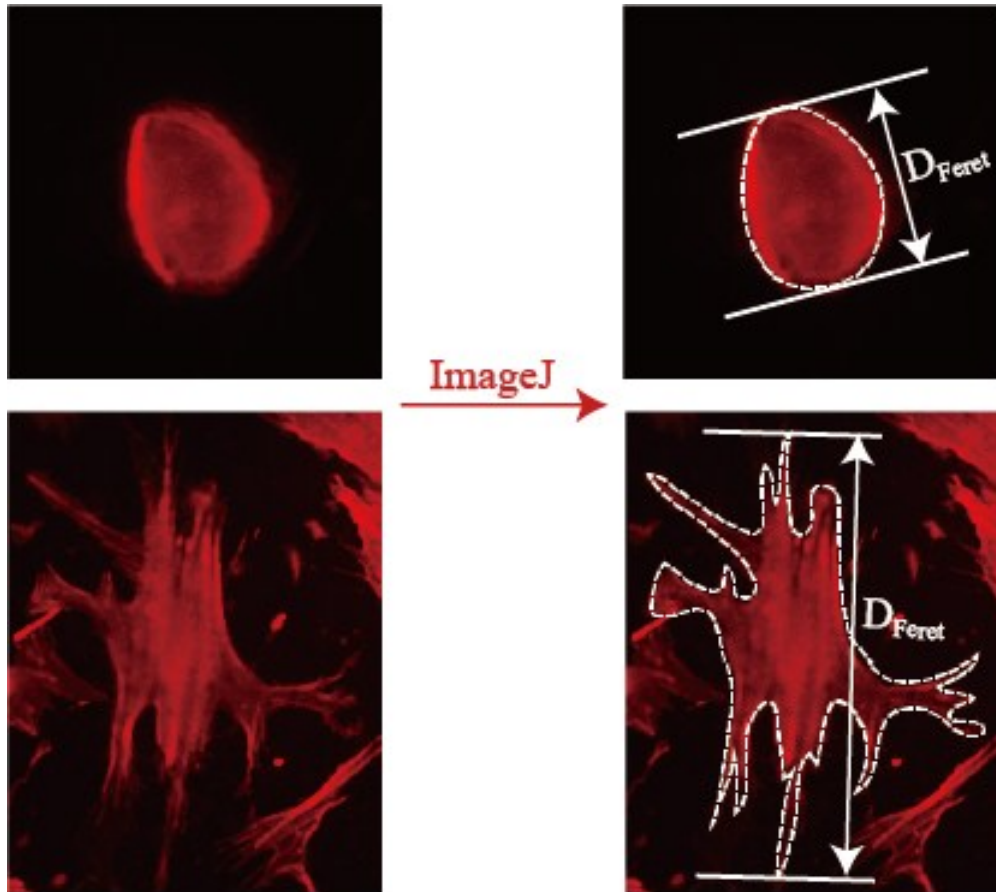

**Fig. S5** A schematic illustration of the way to semi-quantify the Feret diameter ( $D_{\text{Feret}}$ ) of stained cells with ImageJ. One can obviously see the difference in  $D_{\text{Feret}}$  of a cell owing to the development of filopodia and lamellipodia.

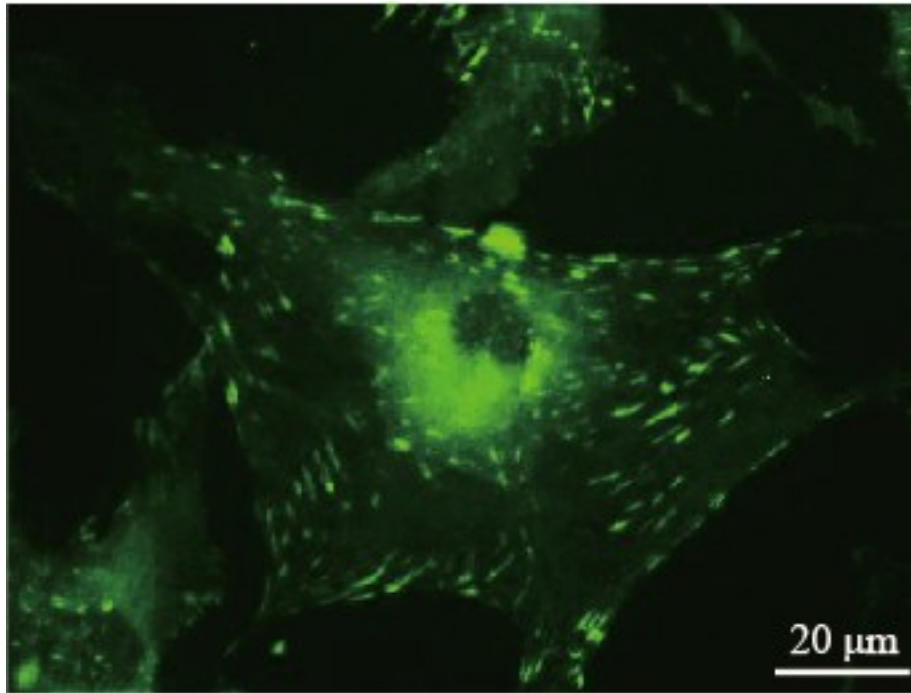

**Fig. S6** Fluorescence micrograph of human foreskin fibroblast (HFF) cells after 1 day of culture on the Ti-PDA-Col surface. Clear focal adhesion plaques can be seen from the morphology of HFF's vinculin.



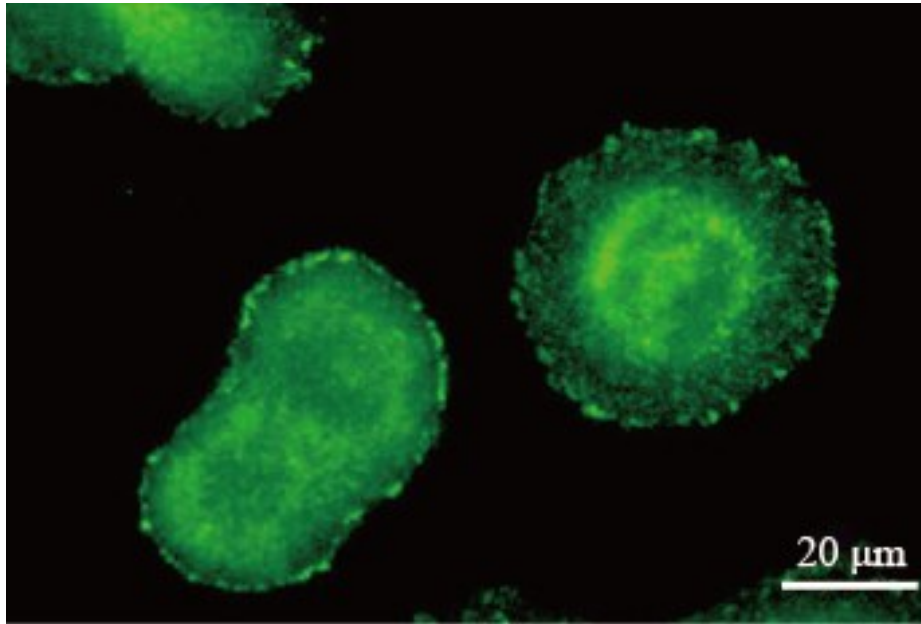

**Fig. S7** Fluorescence micrograph of human immortal keratinocyte (HaCaT) cells after 1 day of culture on Ti-PDA-Col surface. We can see the clear focal adhesion plaques from the morphology of HaCaT's vinculin.

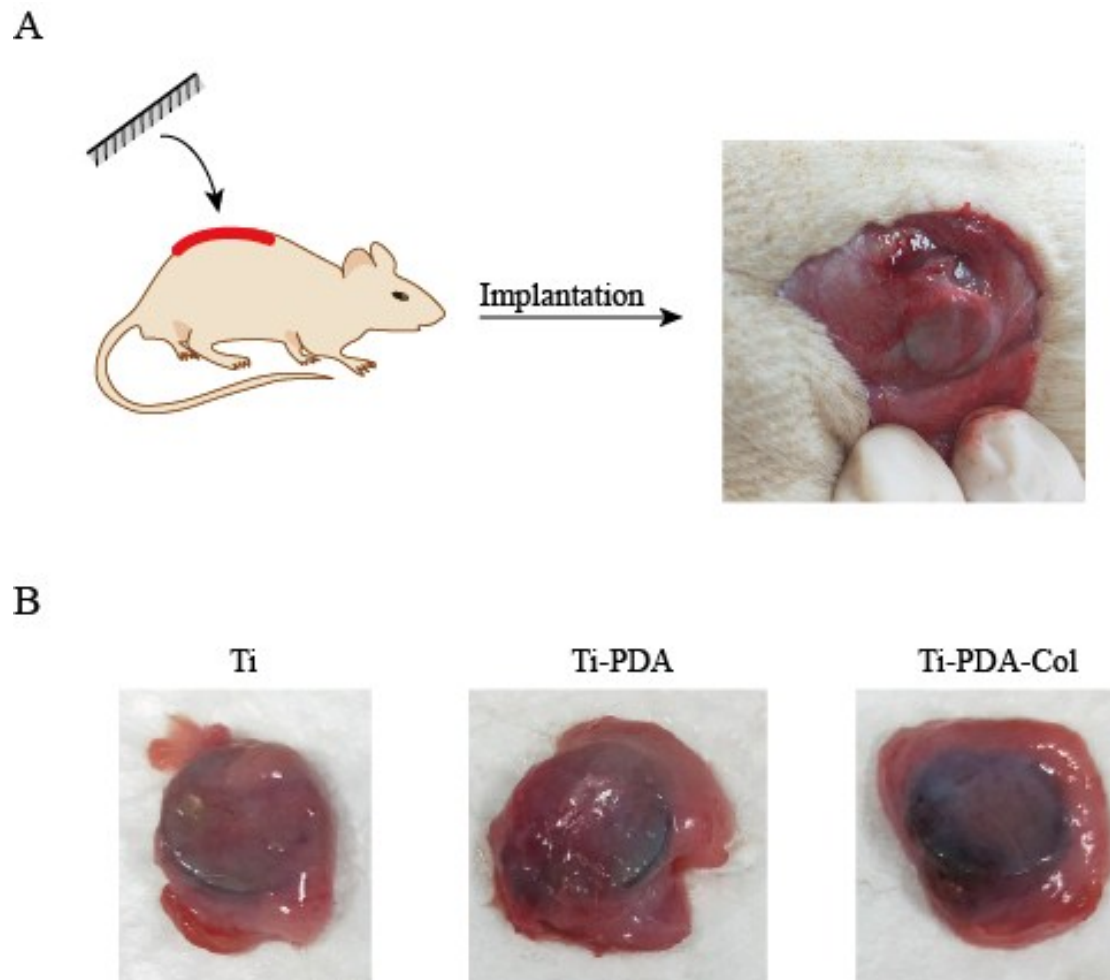

**Fig. S8** (A) Schematic presentation of in vivo tests (left) and the photograph of the implantation region. (B) The global observations of the indicated different samples surrounded by soft tissue after 30 days of implantation.
